# Supplementary material for: Genome-wide DNA methylation and gene expression patterns provide insight into polycystic ovary syndrome development
Source: PubMed Central journal article supplement (PMC4196149; doi:10.18632/oncotarget.2224), 2014-07-16
Supplement: oncotarget-05-6603-s001.pdf [file oncotarget-05-6603-s001.pdf]

# Genome-wide DNA methylation and gene expression patterns provide insight into polycystic ovary syndrome development

## Supplementary Material

A, Hierarchical clustering of the differentially methylated probes (n = 7929)

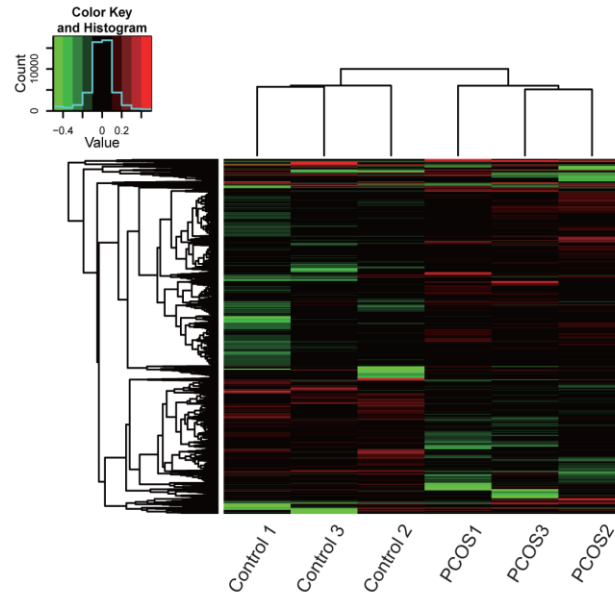

B, Hierarchical clustering of the differentially expressed probes (n = 650)

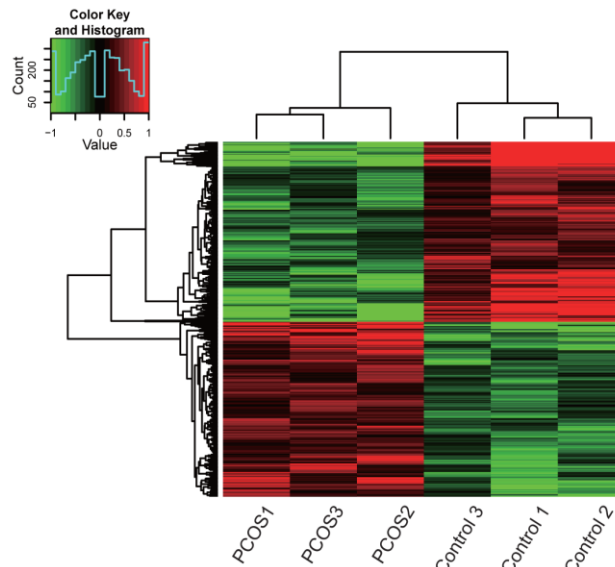

**Supplemental Figure 1:** Hierarchical clustering of the differentially methylated probes and expressed probes
